# Supplementary material for: Protective Effect of Ginsenoside Rg1 on Oxidative Damage Induced by Hydrogen Peroxide in Chicken Splenic Lymphocytes
Source: Oxid Med Cell Longev. 2019 Apr 18;2019:8465030. doi: 10.1155/2019/8465030 (PMC6501224; doi:10.1155/2019/8465030)
Supplement: Supplementary Materials — Table S1: summary of the sequencing and the read mapping of the model and Rg1 groups. Table S2: list of the up-/downregulated DEGs in comparison of Rg1 vs. the model. Table S3: sequences of primers for RT-qPCR. [file 8465030.f1.xlsx]

## Sheet: Sheet1
Table S1 Summary of the sequencing and the reads mapping of the Model and Rg1 group
Samples	Model1	Model2	Model3	Treat1	Treat2	Treat3
Raw Reads Number	52159108	57420818	51065882	51467378	57256928	44415642
Clean Reads Number	50715656	55660242	49493778	49863946	56311340	43042228
Clean Reads Rate (%)	97.23	96.93	96.92	96.88	98.35	96.91
Adapter Contaminated Reads Number	255801	422578	376485	282952	199062	268460
Adapter Contaminated Reads Rate (%)	0.98	1.47	1.47	1.1	0.7	1.21
Ns Reads Number	53484	58544	52333	53190	24278	45453
Ns Reads Rate (%)	0.21	0.2	0.3	0.21	0.08	0.2
Low-quality Reads Number	412441	399166	357234	465574	249454	372794
Low-quality Reads Rate (%)	1.58	1.39	1.4	1.81	0.87	1.68
Error Rate (%)	0.03	0.03	0.03	0.03	0.03	0.03
Raw Q20 Bases Rate (%)	97.25	97.3	97.39	97.26	96.64	97.25
Raw Q30 Bases Rate (%)	93.42	93.46	93.67	93.52	91.64	93.45
Mapped Reads	44,234,411	48,420,255	43,191,322	42964438	50380119	37428729
Mapping Rate (%)	87.22	86.99	87.27	86.16	89.47	86.96
Multi Map Reads	1,896,814	2,110,666	1,836,829	1813855	2085390	1577357
Multi Map Rate (%)	3.74	3.79	3.71	3.64	3.7	3.66

## Sheet: Sheet2
Table S2 List of the up-/down-regulated DEGs in comparison Rg1 vs. Model
Gene ID	Gene Symbol	LOG2(Fold Change)	Up/Down	Gene Description
395256	MEPE	-5.0396	DOWN	matrix extracellular phosphoglycoprotein transcript variant X1
107057238	LOC107057238	-4.4769	DOWN	C-C motif chemokine 3-like
416999	AIFM3	-4.3895	DOWN	apoptosis-inducing factor mitochondrion-associated 3 transcript variant X1
107049332	LOC107049332	-4.3099	DOWN	endogenous retrovirus group K member 113 Pol protein-like
101747275	KLHL35	-4.2002	DOWN	kelch-like protein 35-like transcript variant X2
418487	MAP3K7CL	-4.1268	DOWN	MAP3K7 C-terminal like transcript variant X1
428817	OR8D4	-4.0107	DOWN	olfactory receptor family 8 subfamily D member 4
107050531	LOC107050531	-3.673	DOWN	deleted in malignant brain tumors 1 protein-like
107051324	LOC107051324	-3.5472	DOWN	transcriptional repressor scratch 1-like
107052922	LOC107052922	-3.5331	DOWN	uncharacterized LOC107052922
107053942	LOC107053942	-3.4087	DOWN	uncharacterized LOC107053942
107051726	LOC107051726	-3.3402	DOWN	uncharacterized LOC107051726
771676	HOXB13	-3.2766	DOWN	homeobox B13
430981	GABRR3	-2.975	DOWN	gamma-aminobutyric acid (GABA) A receptor rho 3 transcript variant X2
418719	SLC9A2	-2.9088	DOWN	solute carrier family 9 subfamily A (NHE2 cation proton antiporter 2) member 2
107056018	LOC107056018	-2.8532	DOWN	protein virilizer homolog
107052746	LOC107052746	-2.8188	DOWN	uncharacterized LOC107052746
107049784	LOC107049784	-2.6871	DOWN	scavenger receptor cysteine-rich type 1 protein M130-like
107052623	PTF1A	-2.6066	DOWN	pancreas specific transcription factor 1a
431047	NR1D1	-2.5372	DOWN	nuclear receptor subfamily 1 group D member 1 transcript variant X2
771679	CCLI8	-2.401	DOWN	chemokine
418528	TMPRSS2	-2.3948	DOWN	transmembrane protease serine 2 transcript variant X1
100858814	LOC100858814	-2.3936	DOWN	adenine phosphoribosyltransferase-like transcript variant X1
107057583	RNADHX58	-2.3399	DOWN	probable ATP-dependent RNA helicase DHX58
431254	NKX6-3	-2.2955	DOWN	NK6 homeobox 3 transcript variant X2
427288	TRABD2A	-2.2189	DOWN	TraB domain containing 2A transcript variant X2
107050497	LOC107050497	-2.1618	DOWN	uncharacterized LOC107050497
419244	EEF1A2	-2.1549	DOWN	eukaryotic translation elongation factor 1 alpha 2
422184	PIH1D3	-2.1123	DOWN	PIH1 domain containing 3
107057325	LOC107057325	-2.0808	DOWN	nuclear receptor coactivator 5-like
395768	MNX1	-2.078	DOWN	motor neuron and pancreas homeobox 1
417231	COL27A1	-2.037	DOWN	collagen type XXVII alpha 1 transcript variant X2
101749282	LOC101749282	-1.9918	DOWN	uncharacterized LOC101749282
420168	PPP1R42	-1.9762	DOWN	protein phosphatase 1 regulatory subunit 42 transcript variant X2
415395	THSD4	-1.9083	DOWN	thrombospondin type I domain containing 4 transcript variant X1
421862	CD109	-1.9045	DOWN	CD109 molecule
107054511	LOC107054511	-1.8908	DOWN	uncharacterized LOC107054511
419085	MYO7A	-1.819	DOWN	myosin VIIA transcript variant X5
107054597	LOC107054597	-1.8153	DOWN	uncharacterized LOC107054597
416988	HSPB8	-1.809	DOWN	heat shock 22kDa protein 8
101749962	LOC101749962	-1.7918	DOWN	uncharacterized LOC101749962
419528	NEFL	-1.7866	DOWN	neurofilament light polypeptide
430697	KLF8	-1.7324	DOWN	Kruppel-like factor 8 transcript variant X2
419352	PARD6B	-1.7152	DOWN	par-6 family cell polarity regulator beta
423931	BAG3	-1.7109	DOWN	BCL2-associated athanogene 3 transcript variant X3
107054987	LOC107054987	-1.6757	DOWN	leucine-rich repeat extensin-like protein 5
396361	INHBA	-1.659	DOWN	inhibin beta A transcript variant X1
419828	NUAK2	-1.6442	DOWN	NUAK family SNF1-like kinase 2
107054827	LOC107054827	-1.6438	DOWN	inhibitor of growth protein 3 pseudogene
776202	LILRA6L1	-1.6357	DOWN	leukocyte immunoglobulin-like receptor subfamily A member 6-like
420220	C8ORF88	-1.6235	DOWN	chromosome 8 open reading frame 88
107054664	LOC107054664	-1.6155	DOWN	uncharacterized LOC107054664
107052606	LOC107052606	-1.5959	DOWN	uncharacterized LOC107052606
423477	TNFAIP2	-1.584	DOWN	tumor necrosis factor alpha-induced protein 2
374196	PDGFA	-1.567	DOWN	platelet-derived growth factor alpha polypeptide
101749178	LOC101749178	-1.5094	DOWN	uncharacterized LOC101749178 transcript variant X2
420301	LY6CLEL	-1.5046	DOWN	lymphocyte antigen 6 complex locus E-like
429084	F3	-1.504	DOWN	coagulation factor III (thromboplastin tissue factor)
396328	KCNJ2	-1.4787	DOWN	potassium inwardly-rectifying channel subfamily J member 2
417535	CCLI7	-1.4533	DOWN	chemokine
100858404	HOXA5	-1.4364	DOWN	homeobox A5 transcript variant X1
420873	NRN1	-1.4329	DOWN	neuritin 1
418982	MMP1	-1.4325	DOWN	matrix metallopeptidase 1 (interstitial collagenase)
418917	HSPH1	-1.4203	DOWN	heat shock 105kDa/110kDa protein 1 transcript variant X1
101750423	LOC101750423	-1.4195	DOWN	synaptotagmin-5-like
419205	OCSTAMP	-1.4014	DOWN	osteoclast stimulatory transmembrane protein
107055406	LMBR1L	-1.401	DOWN	limb development membrane protein 1-like
107052672	LOC107052672	-1.4002	DOWN	uncharacterized LOC107052672 transcript variant X2
769134	ARL8BL	-1.3982	DOWN	ADP-ribosylation factor-like 8B-like
107052582	LOC107052582	-1.3828	DOWN	uncharacterized LOC107052582
428310	HSP25	-1.3766	DOWN	heat shock protein 25
415360	DNAJA4	-1.3681	DOWN	DnaJ (Hsp40) homolog subfamily A member 4 transcript variant X3
107052033	LOC107052033	-1.3648	DOWN	uncharacterized LOC107052033
107052605	LOC107052605	-1.3343	DOWN	uncharacterized LOC107052605 transcript variant X2
772158	LOC772158	-1.3306	DOWN	heat shock protein 30C-like
107049075	LOC107049075	-1.315	DOWN	dnaJ homolog subfamily B member 1-like
417567	SEBOX	-1.305	DOWN	SEBOX homeobox
107052088	LOC107052088	-1.3005	DOWN	uncharacterized LOC107052088
772063	STEAP4	-1.2982	DOWN	STEAP family member 4 transcript variant X3
100859173	LOC100859173	-1.2885	DOWN	probable G-protein coupled receptor 83-like transcript variant X2
107052201	LOC107052201	-1.285	DOWN	alpha-1-acid glycoprotein 1-like transcript variant X1
771476	LMOD1	-1.2687	DOWN	leiomodin 1 (smooth muscle)
396177	EPHB1	-1.2673	DOWN	EPH receptor B1 transcript variant X2
420317	KHDRBS3	-1.264	DOWN	KH domain containing RNA binding signal transduction associated 3 transcript variant X1
418105	SVOPL	-1.2424	DOWN	SVOP-like transcript variant X1
417398	TMEM100	-1.2388	DOWN	transmembrane protein 100
107054972	LOC107054972	-1.2312	DOWN	fer-1-like protein 5
101748842	PARD6A	-1.216	DOWN	par-6 partitioning defective 6 homolog alpha (C. elegans) transcript variant X3
395092	PDE6B	-1.2101	DOWN	phosphodiesterase 6B cGMP-specific rod beta (congenital stationary night blindness 3 autosomal dominant)
770874	RGS7BP	-1.2069	DOWN	regulator of G-protein signaling 7 binding protein
100858808	DNAJB1	-1.2062	DOWN	DnaJ (Hsp40) homolog subfamily B member 1
427491	C2CD4A	-1.1995	DOWN	C2 calcium-dependent domain containing 4C-like
100859725	IGSF1L8	-1.1994	DOWN	immunoglobulin superfamily member 1-like 8
422166	EDA2R	-1.1993	DOWN	ectodysplasin A2 receptor
101749541	LOC101749541	-1.1891	DOWN	translation initiation factor IF-2-like
100856853	TRNAK-UUU	-1.1881	DOWN	transfer RNA lysine (anticodon UUU)
408036	EREG	-1.1875	DOWN	epiregulin
374232	KAT2A	-1.1827	DOWN	K(lysine) acetyltransferase 2A transcript variant X1
423463	HSP90AA1	-1.1802	DOWN	heat shock protein 90kDa alpha (cytosolic) class A member 1
374165	FABP4	-1.1798	DOWN	fatty acid binding protein 4 adipocyte
423504	HSPA2	-1.1692	DOWN	heat shock 70kDa protein 2
777386	PRDM8	-1.1691	DOWN	PR domain zinc finger protein 8-like transcript variant X2
100857832	DDIT3	-1.1636	DOWN	DNA-damage-inducible transcript 3
427789	MYH1G	-1.1522	DOWN	myosin heavy chain 1G skeletal muscle (similar to human myosin heavy chain 1 skeletal muscle adult) transcript variant X2
107052673	LOC107052673	-1.151	DOWN	uncharacterized LOC107052673 transcript variant X2
423061	TUB	-1.1465	DOWN	tubby bipartite transcription factor transcript variant X5
420502	OTUD1	-1.1387	DOWN	OTU domain containing 1
419679	MFSD2A	-1.1351	DOWN	major facilitator superfamily domain containing 2A
107053695	LOC107053695	-1.1054	DOWN	uncharacterized LOC107053695
101752166	LOC101752166	-1.1006	DOWN	uncharacterized LOC101752166 transcript variant X2
373987	THBS1	-1.0971	DOWN	thrombospondin 1
424018	PRLH	-1.0964	DOWN	prolactin releasing hormone
770435	DUSP8	-1.0888	DOWN	dual specificity phosphatase 8 transcript variant X2
107052635	LOC107052635	-1.0851	DOWN	uncharacterized LOC107052635
424577	KLF-4	-1.082	DOWN	Kruppel-like factor 1 (erythroid)
396179	EPHB3	-1.0814	DOWN	EPH receptor B3 transcript variant X2
423363	JDP2	-1.0777	DOWN	Jun dimerization protein 2 transcript variant X1
395993	GFRA2	-1.074	DOWN	GDNF family receptor alpha 2
107055935	LOC107055935	-1.0724	DOWN	tubulin beta chain-like
395872	IL8L1	-1.0696	DOWN	interleukin 8-like 1
101752158	LOC101752158	-1.0696	DOWN	uncharacterized LOC101752158
100859492	LOC100859492	-1.0639	DOWN	uncharacterized LOC100859492
374080	TLE4	-1.0625	DOWN	transducin-like enhancer of split 4 (E(sp1) homolog Drosophila) transcript variant X1
423589	PLEKHC1	-1.0624	DOWN	pleckstrin homology domain containing family C (with FERM domain) member 1 transcript variant X1
395096	TNFRSF6B	-1.0605	DOWN	tumor necrosis factor receptor superfamily member 6b decoy transcript variant X3
416108	BHLHE40	-1.0603	DOWN	basic helix-loop-helix family member e40
419067	RELT	-1.0518	DOWN	RELT tumor necrosis factor receptor
107052774	LOC107052774	-1.0491	DOWN	uncharacterized LOC107052774
395389	ALDH1A3	-1.0476	DOWN	aldehyde dehydrogenase 1 family member A3
395148	NEBL	-1.0468	DOWN	nebulette
431060	IGSF1L9	-1.0464	DOWN	immunoglobulin superfamily member 1-like
771550	EPHA2	-1.0421	DOWN	EPH receptor A2
424855	TM4SF19	-1.041	DOWN	transmembrane 4 L six family member 19 transcript variant X1
428949	UGT8L	-1.0408	DOWN	UDP glycosyltransferase 8-like
101751586	SLC35E4	-1.0403	DOWN	solute carrier family 35 member E4
424312	RND3	-1.0372	DOWN	Rho family GTPase 3
396216	CSF3	-1.0343	DOWN	colony stimulating factor 3 (granulocyte)
420425	CSRNP1	-1.029	DOWN	cysteine-serine-rich nuclear protein 1 transcript variant X3
768830	CKS2	-1.0259	DOWN	CDC28 protein kinase regulatory subunit 2
395853	HSPA8	-1.024	DOWN	heat shock 70kDa protein 8
415537	IGDCC4	-1.0177	DOWN	immunoglobulin superfamily DCC subclass member 4 transcript variant X1
418473	CXADR	-1.0149	DOWN	coxsackie virus and adenovirus receptor transcript variant X2
107049603	LOC107049603	-1.0112	DOWN	protein fosB-like
373903	DIO2	-1.0082	DOWN	deiodinase iodothyronine type II
107051863	LOC107051863	-1.0068	DOWN	uncharacterized LOC107051863
420838	CD83	-1.0067	DOWN	CD83 molecule
771509	CDC42EP4	-1.0033	DOWN	CDC42 effector protein (Rho GTPase binding) 4 transcript variant X6
418026	KDELR3	-0.99452	DOWN	KDEL (Lys-Asp-Glu-Leu) endoplasmic reticulum protein retention receptor 3
422263	PCDH19	-0.99394	DOWN	protocadherin 19 transcript variant X1
419812	C26H6ORF222	-0.99313	DOWN	chromosome 26 open reading frame human C6orf222 transcript variant X2
395896	EFNB1	-0.9913	DOWN	ephrin-B1 transcript variant X2
415691	BCAR1	-0.98318	DOWN	breast cancer anti-estrogen resistance 1 transcript variant X2
416875	CUX2	-0.98031	DOWN	cut-like homeobox 2 transcript variant X4
395643	PDLIM4	-0.97549	DOWN	PDZ and LIM domain 4
373932	NKX3-2	-0.97384	DOWN	NK3 homeobox 2
100858653	DHX58	-0.97299	DOWN	DEXH (Asp-Glu-X-His) box polypeptide 58 transcript variant X1
426126	MTHFD2	-0.97118	DOWN	methylenetetrahydrofolate dehydrogenase (NADP+ dependent) 2 methenyltetrahydrofolate cyclohydrolase
395805	MYOM1	-0.97052	DOWN	myomesin 1 transcript variant X3
428065	PCDH8	-0.95486	DOWN	protocadherin 8 transcript variant X1
396495	IL8L2	-0.95109	DOWN	interleukin 8-like 2
100034745	PTGER2	-0.95047	DOWN	prostaglandin E receptor 2 (subtype EP2) 53kDa
427409	DNAJB5	-0.94768	DOWN	DnaJ (Hsp40) homolog subfamily B member 5 transcript variant X3
395090	TNFRSF8	-0.94461	DOWN	tumor necrosis factor receptor superfamily member 8 transcript variant X5
421219	TLR15	-0.94165	DOWN	toll-like receptor 15
396088	CRYBB2	-0.93939	DOWN	crystallin beta B2 transcript variant X1
424917	MUC4L	-0.93652	DOWN	mucin-4-like transcript variant X1
423890	DUSP5	-0.93322	DOWN	dual specificity phosphatase 5
425104	ZFAND2A	-0.93089	DOWN	zinc finger AN1-type domain 2A transcript variant X1
100858739	LOC100858739	-0.92797	DOWN	uncharacterized LOC100858739
100315749	MIR1627	-0.92435	DOWN	gga-miR-1627-5p
373928	PPARG	-0.92375	DOWN	peroxisome proliferator-activated receptor gamma transcript variant X1
374192	DUSP1	-0.91934	DOWN	dual specificity phosphatase 1
421673	GPR126	-0.9182	DOWN	G protein-coupled receptor 126 transcript variant X4
416796	GALNT9	-0.91466	DOWN	UDP-N-acetyl-alpha-D-galactosamine:polypeptide N-acetylgalactosaminyltransferase 9 (GalNAc-T9) transcript variant X2
107055056	LOC107055056	-0.9085	DOWN	uncharacterized LOC107055056
107054535	LOC107054535	-0.9075	DOWN	uncharacterized LOC107054535
417241	TLR4	-0.90514	DOWN	toll-like receptor 4
428386	TRIB1	-0.90127	DOWN	tribbles pseudokinase 1
107054798	LOC107054798	-0.89942	DOWN	translation initiation factor IF-2-like transcript variant X1
419101	PROSER2	-0.89873	DOWN	proline and serine rich 2 transcript variant X2
107052602	LOC107052602	-0.8977	DOWN	uncharacterized LOC107052602
421369	ATF3	-0.89461	DOWN	activating transcription factor 3 transcript variant X4
101749560	LOC101749560	-0.89417	DOWN	uncharacterized LOC101749560
395551	CCL4	-0.89393	DOWN	chemokine (C-C motif) ligand 4
378912	RGS2	-0.88695	DOWN	regulator of G-protein signaling 2 24kDa
769087	ANGPTL4	-0.88548	DOWN	angiopoietin-like 4
378914	CDKN1A	-0.88305	DOWN	cyclin-dependent kinase inhibitor 1A (p21 Cip1)
107054553	LOC107054553	-0.88168	DOWN	uncharacterized LOC107054553 transcript variant X2
427808	RAB11FIP4	-0.88055	DOWN	RAB11 family interacting protein 4 (class II) transcript variant X2
417355	JMJD6	-0.8803	DOWN	jumonji domain containing 6
107056408	LOC107056408	-0.87774	DOWN	nocturnin-like
100858796	LOC100858796	-0.87595	DOWN	sestrin-2-like
107049468	LOC107049468	-0.8758	DOWN	protein phosphatase 1 regulatory subunit 15A-like
426175	NXNL2	-0.87352	DOWN	nucleoredoxin-like 2
427220	TMEM171	-0.8726	DOWN	transmembrane protein 171 transcript variant X1
395903	KCNJ4	-0.87007	DOWN	potassium channel inwardly rectifying subfamily J member 4 transcript variant X1
107049350	LOC107049350	-0.86973	DOWN	endogenous retrovirus group K member 25 Pol protein-like
100499189	CSF1	-0.86904	DOWN	colony-stimulating factor 1 transcript variant X1
396287	HMOX1	-0.86608	DOWN	heme oxygenase 1
395281	ID3	-0.8652	DOWN	inhibitor of DNA binding 3 dominant negative helix-loop-helix protein
100857430	ECE2	-0.86074	DOWN	endothelin converting enzyme 2 transcript variant X2
768655	PIM3	-0.85957	DOWN	pim-3 oncogene
427376	DNAJA1	-0.85857	DOWN	DnaJ (Hsp40) homolog subfamily A member 1
100857932	LOC100857932	-0.85636	DOWN	mucin-2-like
101748931	GDF15	-0.85499	DOWN	growth/differentiation factor 15-like
770805	SQSTM1	-0.85388	DOWN	sequestosome 1 transcript variant X4
425055	CYP8B1	-0.84893	DOWN	cytochrome P450 family 8 subfamily B polypeptide 1
101750175	PTCHD3L	-0.84555	DOWN	patched domain-containing protein 3-like
395519	MAFF	-0.84328	DOWN	v-maf avian musculoaponeurotic fibrosarcoma oncogene homolog F transcript variant X1
404779	NOCT	-0.83141	DOWN	nocturnin transcript variant X3
421934	KLF11	-0.82316	DOWN	Kruppel-like factor 11
770026	LOC770026	-0.82316	DOWN	OX-2 membrane glycoprotein-like
424320	NR4A2	-0.82151	DOWN	nuclear receptor subfamily 4 group A member 2 transcript variant X2
769066	TP53INP2	-0.821	DOWN	tumor protein p53 inducible nuclear protein 2 transcript variant X1
768449	F2RL2	-0.81962	DOWN	coagulation factor II (thrombin) receptor-like 2
771782	RAB7B	-0.81683	DOWN	RAB7B member RAS oncogene family
101749344	LOC101749344	-0.80946	DOWN	uncharacterized LOC101749344 transcript variant X2
424027	SH3BP4	-0.80781	DOWN	SH3-domain binding protein 4 transcript variant X2
107052975	LOC107052975	-0.80373	DOWN	uncharacterized LOC107052975
769230	PCSK1	-0.79879	DOWN	proprotein convertase subtilisin/kexin type 1
395210	SPP1	-0.79832	DOWN	secreted phosphoprotein 1
424367	HSD17B7	-0.79759	DOWN	hydroxysteroid (17-beta) dehydrogenase 7 transcript variant 2
102725543	EGR3	-0.79424	DOWN	early growth response protein 3
425031	MME	-0.79226	DOWN	membrane metallo-endopeptidase
419932	BTG2	-0.78963	DOWN	BTG family member 2
395890	NES	-0.78636	DOWN	nestin
395479	PPARD	-0.77552	DOWN	peroxisome proliferator-activated receptor delta
101750112	LOC101750112	-0.77403	DOWN	polyketide synthase PksM-like transcript variant X1
424673	JUN	-0.77361	DOWN	jun proto-oncogene
416693	NET1	-0.77358	DOWN	neuroepithelial cell transforming 1 transcript variant X1
422637	STBD1	-0.77265	DOWN	starch binding domain 1 transcript variant X2
768922	FAM102B	-0.77033	DOWN	family with sequence similarity 102 member B transcript variant X3
404539	DMP1	-0.76822	DOWN	dentin matrix acidic phosphoprotein 1
395082	CCL20	-0.76553	DOWN	chemokine (C-C motif) ligand 20
428417	PTCHD3	-0.75995	DOWN	patched domain containing 3
427254	ZFAND5	-0.75978	DOWN	zinc finger AN1-type domain 5 transcript variant X1
100859744	RASGEF1B	-0.7509	DOWN	RasGEF domain family member 1B transcript variant X4
101751218	MXD3	-0.74824	DOWN	MAX dimerization protein 3 transcript variant X1
420179	MSC	-0.74663	DOWN	musculin transcript variant X2
419530	SLC25A37	-0.7443	DOWN	solute carrier family 25 (mitochondrial iron transporter) member 37 transcript variant X1
100858361	HSD11B2L	-0.74164	DOWN	hydroxysteroid (11-beta) dehydrogenase 2-like transcript variant X2
427758	RALGDS	-0.73394	DOWN	ral guanine nucleotide dissociation stimulator transcript variant X5
769212	GPR183	-0.72788	DOWN	G protein-coupled receptor 183 transcript variant X2
423634	TMEM254	-0.72128	DOWN	transmembrane protein 254 transcript variant 1
420486	LOC420486	-0.72045	DOWN	mycocerosic acid synthase-like
420771	C2H7ORF25	-0.71669	DOWN	chromosome 2 open reading frame human C7orf25 transcript variant X4
771670	UBXN10	-0.70997	DOWN	UBX domain protein 10 transcript variant X2
422692	TIFA	-0.70774	DOWN	TRAF-interacting protein with forkhead-associated domain transcript variant X2
416852	HPD	-0.70567	DOWN	4-hydroxyphenylpyruvate dioxygenase
100315780	MIR1682	-0.70445	DOWN	gga-miR-1682
771058	BMP8B	-0.70408	DOWN	bone morphogenetic protein 8b transcript variant X1
418054	FOXRED2	-0.70384	DOWN	FAD-dependent oxidoreductase domain containing 2 transcript variant X2
395925	KCNJ5	-0.70301	DOWN	potassium inwardly-rectifying channel subfamily J member 5 transcript variant X3
395873	K123	-0.703	DOWN	K123 protein transcript variant X6
424707	WLS	-0.70023	DOWN	wntless Wnt ligand secretion mediator
424615	MOBKL2C	-0.69917	DOWN	MOB1 Mps One Binder kinase activator-like 2C (yeast) transcript variant X6
415854	FANCA	-0.69798	DOWN	Fanconi anemia complementation group A transcript variant X6
429096	PIK3R3	-0.69791	DOWN	phosphoinositide-3-kinase regulatory subunit 3 (gamma) transcript variant X1
420996	NR4A3	-0.69749	DOWN	nuclear receptor subfamily 4 group A member 3 transcript variant X4
419400	C21H1ORF222	-0.6943	DOWN	chromosome 21 open reading frame human C1orf222 transcript variant X5
101747587	UBB	-0.69341	DOWN	polyubiquitin-C-like transcript variant X1
420885	BPHL	-0.69281	DOWN	biphenyl hydrolase-like (serine hydrolase) transcript variant X2
427908	C1QTNF6	-0.69198	DOWN	C1q and tumor necrosis factor related protein 6 transcript variant X3
424414	KIAA1614	-0.68946	DOWN	KIAA1614
395383	SLC16A3	-0.68823	DOWN	solute carrier family 16 (monocarboxylate transporter) member 3
426086	LPAR2	-0.68569	DOWN	lysophosphatidic acid receptor 2
428932	GPR137C	-0.68264	DOWN	G protein-coupled receptor 137C
425431	LOC425431	-0.68191	DOWN	dnaJ homolog subfamily A member 1-like
427546	PLEKHF1	-0.68171	DOWN	pleckstrin homology domain containing family F (with FYVE domain) member 1 transcript variant X4
107051560	LOC107051560	-0.67867	DOWN	7SK snRNA methylphosphate capping enzyme-like
107051601	LOC107051601	-0.67499	DOWN	uncharacterized LOC107051601
395101	UNC5C	-0.6732	DOWN	unc-5 homolog C (C. elegans) transcript variant X1
418812	IRG1	-0.67303	DOWN	immunoresponsive 1 homolog (mouse) transcript variant X1
418554	VTCN1L	-0.67204	DOWN	V-set domain containing T cell activation inhibitor 1-like transcript variant X2
100861584	SLC6A8	-0.67028	DOWN	solute carrier family 6 (neurotransmitter transporter creatine) member 8
100859120	AHNAK2	-0.66996	DOWN	AHNAK nucleoprotein 2
107055744	LOC107055744	-0.66129	DOWN	uncharacterized LOC107055744
430423	DOK1	-0.65337	DOWN	docking protein 1 62kDa (downstream of tyrosine kinase 1)
424059	HSPD1	-0.65108	DOWN	heat shock 60kDa protein 1 (chaperonin)
374109	SEMA3F	-0.64739	DOWN	sema domain immunoglobulin domain (Ig) short basic domain secreted (semaphorin) 3F
769223	LOC769223	-0.64679	DOWN	complexin-3-like
417230	SLC25A25	-0.64545	DOWN	solute carrier family 25 (mitochondrial carrier%3B phosphate carrier) member 25 transcript variant X2
107053517	LOC107053517	-0.64488	DOWN	uncharacterized LOC107053517
418784	MBNL2	-0.6408	DOWN	muscleblind-like splicing regulator 2 transcript variant X13
107051147	LOC107051147	-0.63984	DOWN	uncharacterized LOC107051147 transcript variant X1
421684	TNFAIP3	-0.63345	DOWN	tumor necrosis factor alpha-induced protein 3 transcript variant X1
419914	TSPO2	-0.62922	DOWN	translocator protein 2 transcript variant X1
374102	SDC2	-0.62646	DOWN	syndecan 2
378903	CREM	-0.62565	DOWN	cAMP responsive element modulator transcript variant X2
418469	HSPA13	-0.62454	DOWN	heat shock protein 70kDa family member 13
428209	PTAFR	-0.62035	DOWN	platelet-activating factor receptor
378902	DDTNFR23	-0.61979	DOWN	death domain-containing tumor necrosis factor receptor superfamily member 23
420894	SERPINB1	-0.61892	DOWN	serpin peptidase inhibitor clade B (ovalbumin) member 1 transcript variant X2
430589	C25H1ORF43	-0.61722	DOWN	chromosome 25 open reading frame human C1orf43 transcript variant 2
107055371	RAB3A	-0.61346	DOWN	RAB3A member RAS oncogene family
416437	BAIAP2L1	-0.6114	DOWN	BAI1-associated protein 2-like 1
107054748	LOC107054748	-0.6089	DOWN	uncharacterized LOC107054748
107054095	LOC107054095	-0.60767	DOWN	uncharacterized LOC107054095
419771	IL10RA	-0.60763	DOWN	interleukin 10 receptor alpha
100858221	MARVELD1	-0.60647	DOWN	MARVEL domain containing 1
101750986	IER5	-0.60564	DOWN	immediate early response 5
100858989	CA13	-0.60455	DOWN	carbonic anhydrase XIII
416496	MAP2K3	-0.60256	DOWN	mitogen-activated protein kinase kinase 3
101749622	SERPINB10 CPOX	-0.59918	DOWN	serpin peptidase inhibitor clade B (ovalbumin) member 10 CPOX transcript variant X1
100859845	ATG101	-0.59806	DOWN	autophagy-related protein 101-like transcript variant X5
415540	VWA9	-0.59802	DOWN	von Willebrand factor A domain containing 9
416339	HSPA4	-0.59227	DOWN	heat shock 70kDa protein 4 transcript variant X1
100857605	RNF24	-0.59209	DOWN	ring finger protein 24 transcript variant X2
425987	M1AP	-0.59197	DOWN	meiosis 1 associated protein transcript variant X4
427237	PLIN2	-0.59193	DOWN	perilipin 2 transcript variant X3
421074	RIOK3	-0.58891	DOWN	RIO kinase 3 transcript variant X1
420895	SERPINB6	-0.58427	DOWN	serpin peptidase inhibitor clade B (ovalbumin) member 6 transcript variant X1
552895	ALAS1	-0.5791	DOWN	aminolevulinate delta- synthase 1
396512	FOS	-0.57749	DOWN	FBJ murine osteosarcoma viral oncogene homolog
430162	NAV1	-0.57588	DOWN	neuron navigator 1 transcript variant X4
420124	ELL	-0.57504	DOWN	elongation factor RNA polymerase II
417961	HEBP1	-0.56784	DOWN	heme binding protein 1 transcript variant X1
427148	GPBP1	-0.56399	DOWN	GC-rich promoter binding protein 1 transcript variant X1
427708	DYL1	-0.55603	DOWN	dynein light chain 1 cytoplasmic
423631	RASGEF1A	-0.55479	DOWN	RasGEF domain family member 1A transcript variant X1
100859277	CYP4F22	-0.55027	DOWN	cytochrome P450 family 4 subfamily F polypeptide 22
421755	AMD1	-0.54406	DOWN	adenosylmethionine decarboxylase 1
416182	ETF1	-0.53329	DOWN	eukaryotic translation termination factor 1
107053096	LOC107053096	4.5589	Up	uncharacterized LOC107053096
428574	C6ORF137	4.519	Up	transmembrane protein 151B
378798	ARSH	4.1849	Up	arylsulfatase family member H transcript variant X1
107056783	LOC107056783	4.1626	Up	probable E3 ubiquitin-protein ligase HERC1
107049887	LOC107049887	4.131	Up	uncharacterized LOC107049887
107056978	LOC107056978	3.7949	Up	leucine--tRNA ligase cytoplasmic-like
107056784	LOC107056784	3.7846	Up	probable E3 ubiquitin-protein ligase HERC1
427656	LOC427656	3.7549	Up	forkhead box protein L1-like
107057135	LOC107057135	3.434	Up	rap guanine nucleotide exchange factor 1-like
770795	AMBP	3.4247	Up	alpha-1-microglobulin/bikunin precursor
107056545	LOC107056545	2.6531	Up	mimecan-like
107051743	LOC107051743	2.6362	Up	uncharacterized LOC107051743
107056488	LOC107056488	2.6142	Up	zinc finger protein 862-like
107056208	COX20H	2.6049	Up	cytochrome c oxidase protein 20 homolog transcript variant X2
107056050	LOC107056050	2.5523	Up	uncharacterized LOC107056050
423401	TTC8	2.521	Up	tetratricopeptide repeat domain 8 transcript variant X1
107052488	LOC107052488	2.5094	Up	uncharacterized LOC107052488
421838	RIPPLY2	2.5061	Up	ripply transcriptional repressor 2
100859784	LYPD1	2.2238	Up	LY6/PLAUR domain containing 1
423034	GALNT18	2.1575	Up	UDP-N-acetyl-alpha-D-galactosamine:polypeptide N-acetylgalactosaminyltransferase 18 transcript variant X2
395259	TRPV1	2.1501	Up	transient receptor potential cation channel subfamily V member 1
418824	DIAPH3	2.0022	Up	diaphanous-related formin 3
107054396	LOC107054396	1.9413	Up	uncharacterized LOC107054396
107056112	LOC107056112	1.9066	Up	cytochrome b5 reductase 4-like
101748470	LOC101748470	1.8928	Up	uncharacterized LOC101748470 transcript variant X1
420358	DSCC1	1.8406	Up	DNA replication and sister chromatid cohesion 1
107052965	LOC107052965	1.8179	Up	uncharacterized LOC107052965
415718	FTO	1.7999	Up	fat mass and obesity associated
107052043	LOC107052043	1.7942	Up	uncharacterized LOC107052043
422014	CENPO	1.7846	Up	centromere protein O
107054021	LOC107054021	1.7519	Up	uncharacterized LOC107054021
107056500	LOC107056500	1.6814	Up	eukaryotic translation initiation factor 2-alpha kinase 4-like transcript variant X1
101751674	LOC101751674	1.6738	Up	uncharacterized LOC101751674
102465345	MIR6592	1.6699	Up	gga-miR-6592-3p
424845	PASK	1.4918	Up	PAS domain containing serine/threonine kinase transcript variant X4
107052035	LOC107052035	1.4917	Up	uncharacterized LOC107052035 transcript variant X2
100315832	MIR1771	1.4746	Up	gga-miR-1771
107051682	LOC107051682	1.4661	Up	uncharacterized LOC107051682
101749947	LOC101749947	1.4626	Up	uncharacterized LOC101749947
107055749	LOC107055749	1.4122	Up	synaptotagmin-like protein 2
395545	FRZB	1.4061	Up	frizzled-related protein
418221	ENDOUL	1.3842	Up	endonuclease polyU-specific-like transcript variant X5
427435	SPEF2	1.3656	Up	sperm flagellar 2
422716	CENPE	1.3435	Up	centromere protein E 312kDa transcript variant X2
415934	HEATR8L2	1.3311	Up	HEAT repeat-containing protein 8-like
395135	NUF2	1.3259	Up	NUF2 NDC80 kinetochore complex component
107054934	LOC107054934	1.3199	Up	uncharacterized LOC107054934 transcript variant X2
107053795	LOC107053795	1.3007	Up	uncharacterized LOC107053795
101747644	LOC101747644	1.2948	Up	uncharacterized LOC101747644
107054010	LOC107054010	1.2903	Up	uncharacterized LOC107054010
107057032	BRAT1L	1.2338	Up	BRCA1-associated ATM activator 1-like
420946	FIGNL1	1.2144	Up	fidgetin-like 1 transcript variant X1
395898	ROM1	1.1926	Up	retinal outer segment membrane protein 1 transcript variant X3
107052248	LOC107052248	1.1809	Up	uncharacterized LOC107052248
107055164	LOC107055164	1.1757	Up	glycine-rich protein DOT1-like
416652	HBAA	1.1659	Up	hemoglobin alpha 1
107056482	LOC107056482	1.1373	Up	src substrate protein p85-like
417786	CNTN1	1.1098	Up	contactin 1
107052465	LOC107052465	1.0865	Up	pollen-specific leucine-rich repeat extensin-like protein 1
107054799	LOC107054799	1.0743	Up	uncharacterized LOC107054799
100859701	RSPH10B	1.0644	Up	radial spoke head 10 homolog B (Chlamydomonas) transcript variant X2
107056378	GNPI2	1.0487	Up	glucosamine-6-phosphate isomerase 2 transcript variant X3
107051717	LOC107051717	1.0295	Up	uncharacterized LOC107051717
107056951	LOC107056951	1.0232	Up	serine/threonine-protein kinase 10-like
425021	C9H3ORF55	1.0148	Up	chromosome 9 open reading frame human C3orf55 transcript variant X6
100858763	FAM214B	0.99084	Up	family with sequence similarity 214 member B transcript variant X1
107054527	LOC107054527	0.97548	Up	uncharacterized LOC107054527
417445	MAP2K6	0.97164	Up	mitogen-activated protein kinase kinase 6 transcript variant X2
100858707	CPXM1	0.94845	Up	probable carboxypeptidase X1-like
771514	HAUS3	0.9429	Up	HAUS augmin-like complex subunit 3
419121	GGT7	0.93294	Up	gamma-glutamyltransferase 7
107049115	LOC107049115	0.9312	Up	uncharacterized LOC107049115
373994	POU2AF1	0.9298	Up	POU class 2 associating factor 1 transcript variant X2
107053579	LOC107053579	0.92607	Up	uncharacterized LOC107053579
416728	HAO1	0.91276	Up	hydroxyacid oxidase (glycolate oxidase) 1 transcript variant X1
107052278	LOC107052278	0.86123	Up	ADP-ribosylation factor-like protein 8A pseudogene
378896	TERF1	0.85029	Up	telomeric repeat binding factor (NIMA-interacting) 1
395694	ITPKA	0.84983	Up	inositol 145-trisphosphate 3-kinase A
420162	TNFAIP8L1	0.83912	Up	tumor necrosis factor alpha-induced protein 8-like 1 transcript variant X2
107054186	LOC107054186	0.83708	Up	uncharacterized LOC107054186
424053	C7H2ORF66	0.83468	Up	chromosome 7 open reading frame human C2orf66
100858554	ABHD14A	0.82647	Up	abhydrolase domain containing 14A
418939	FAM123A	0.81744	Up	family with sequence similarity 123A
416352	JAKMIP2	0.80812	Up	janus kinase and microtubule interacting protein 2 transcript variant X5
427355	FREM1	0.79926	Up	FRAS1 related extracellular matrix 1 transcript variant X1
422029	XKR6	0.7952	Up	XK Kell blood group complex subunit-related family member 6
424777	ATR	0.76515	Up	ATR serine/threonine kinase
419937	LOH11CR2A	0.76061	Up	loss of heterozygosity 11 chromosomal region 2 gene A transcript variant X2
107050217	SPC24	0.75223	Up	SPC24 NDC80 kinetochore complex component
419333	LOC419333	0.75122	Up	formin-like protein 16-like
395309	IKZF2	0.74896	Up	IKAROS family zinc finger 2 (Helios) transcript variant X10
100857742	MCM9	0.74592	Up	minichromosome maintenance 9 homologous recombination repair factor transcript variant X1
427419	MYO3AL	0.72156	Up	myosin IIIA-like
101752023	CREBZF	0.6982	Up	CREB/ATF bZIP transcription factor transcript variant X2
424014	MT	0.69698	Up	putative methyltransferase transcript variant X2
417684	PITPNM3	0.68943	Up	PITPNM family member 3 transcript variant X4
100858002	TBX21	0.68067	Up	T-box transcription factor TBX21-like
418411	SH2D1B	0.67407	Up	SH2 domain containing 1B transcript variant X1
426772	BRF2	0.6644	Up	BRF2 RNA polymerase III transcription initiation factor 50 kDa subunit
424170	ABCB11	0.66279	Up	ATP-binding cassette sub-family B (MDR/TAP) member 11 transcript variant X7
417660	DDX52	0.65701	Up	DEAD (Asp-Glu-Ala-Asp) box polypeptide 52 transcript variant X1
101748428	LOC101748428	0.63991	Up	uncharacterized LOC101748428 transcript variant X1
421643	MTRF1L	0.63814	Up	mitochondrial translational release factor 1-like transcript variant X1
100858043	B3GNT4	0.6101	Up	UDP-GlcNAc:betaGal beta-13-N-acetylglucosaminyltransferase 4 transcript variant X1
417887	CEP290	0.59652	Up	centrosomal protein 290kDa transcript variant X1

## Sheet: Sheet3
Table S3 Sequences of primers for RT-qPCR
Gene	Primer sequence (5’-3’)	Product size (bp)
AMBP	ACCAGGATGAGGACATTCAAGTGC	88
	CAGGTGGTGCCAACAGCTACG
DSCC1	GCAGCCTGGTAATCCGTGGTG	186
	AGAAGCCAGCGATCTGCGAATG
TRPV1	GATGGATCACCTGATGGCACCTTC	100
	GCAGCCTGTGATGGAGTCTGTTG
FTO	ACGAGCCTGGTCCTCCAAGAAG	92
	TCGGCAAGAACTAGCAGTAAGCAG
PASK	GCTCCTTGCCATTACCTCCTCTTG	159
	CTTCATCTCTGGACAGCAGGTTGG
AIFM3	ACATTGGCACTGGTGACATTGAGG	119
	CTGTGTCTGAAGAGCCTGCTTGC
PPARD	CAACGCACTGGAGCTGGATGAC	128
	GTGCTCGGAGGATGTTGTCTTGG
IL8L1	GGTATGGCTCAGGCACGTTCAG	127
	CATTCTTGCAGTGAGGTCCGCTAG
TNFRSF6B	ACGCACTACTGGAACTACCTGGAG	114
	CTGGCACTGACACGCTCTGTTG
TNFRSF8	CACAGCCACCGTTCACCTCATC	165
	ATTGCTCAGGTCCACATCTCATGC
PPARG	GAATGCCACAAGCGGAGAAGGAG	88
	GCTCGCAGATCAGCAGATTCAGG
EDA2R	CAAGGACTGTGGTGATGGTGTGG	138
	TTGGACTTCTGGATGCGGTTGATG
RELT	CCTGGAGGCATATGGTCATGTTGG	122
	ATTCTTGGAGCTGTGAAGCGATGG
JUN	GAAGCCGCACCTGAGGAACAAG	111
	CCGTTGCTGGACTGGATGATGAG
MAP3K7CL	AGCTGATTGCCAGACTGGAACAAG	102
	GCTTCAGTGTTCGGTTCTCCTCTG
FOS	TGTTCCTGGCAATATCGTGTTC	62
	CTTTCCCCCCCACGTAAGA
TLR4	GGCAAAAAATGGAATCACGA	201
	CTGGAGGAAGGCAATCATCA
β-actin	GAGAAATTGTGCGTGACATCA	152
	CCTGAACCTCTCATTGCCA
